# Supplementary material
Source: ML conference proceedings conference paper supplement (https://proceedings.mlr.press/v48/zhange16.html)
Supplement: Supplementary file 1 [file zhange16-supp.pdf]

## Supplementary Materials

### A. Proof of Properties of Median (Section 5.1)

#### A.1. Proof of Lemma 1

For simplicity, denote  $\theta_p := \theta_p(F)$  and  $\hat{\theta}_p := \theta_p(\{X_i\}_{i=1}^m)$ . Since  $F'$  is continuous and positive, for an  $\epsilon$ , there exists a  $\delta_1$  such that  $\mathbb{P}(X \leq \theta_p - \epsilon) = p - \delta_1$ , where  $\delta_1 \in (\epsilon l, \epsilon L)$ . Then one has

$$\begin{aligned} \mathbb{P}\left(\hat{\theta}_p < \theta_p - \epsilon\right) &\stackrel{(a)}{=} \mathbb{P}\left(\sum_{i=1}^m \mathbb{1}_{\{X_i \leq \theta_p - \epsilon\}} \geq pm\right) = \mathbb{P}\left(\frac{1}{m} \sum_{i=1}^m \mathbb{1}_{\{X_i \leq \theta_p - \epsilon\}} \geq (p - \delta_1) + \delta_1\right) \\ &\stackrel{(b)}{\leq} \exp(-2m\delta_1^2) \leq \exp(-2m\epsilon^2 l^2), \end{aligned}$$

where (a) is due to the definition of the quantile function in (15) and (b) is due to the fact that  $\mathbb{1}_{\{X_i \leq \theta_p - \epsilon\}} \sim \text{Bernoulli}(p - \delta_1)$  i.i.d., followed by the Hoeffding inequality. Similarly, one can show for some  $\delta_2 \in (\epsilon l, \epsilon L)$ ,

$$\mathbb{P}\left(\hat{\theta}_p > \theta_p + \epsilon\right) \leq \exp(-2m\delta_2^2) \leq \exp(-2m\epsilon^2 l^2).$$

Combining these two inequalities, one has the conclusion.

#### A.2. Proof of Lemma 2

It suffices to show that

$$|X_{(k)} - Y_{(k)}| \leq \max_l |X_l - Y_l|, \quad \forall k = 1, \dots, n. \quad (25)$$

Case 1:  $k = n$ , suppose  $X_{(n)} = X_i$  and  $Y_{(n)} = Y_j$ , i.e.,  $X_i$  is the largest among  $\{X_l\}_{l=1}^n$  and  $Y_j$  is the largest among  $\{Y_l\}_{l=1}^n$ . Then we have either  $X_j \leq X_i \leq Y_j$  or  $Y_i \leq Y_j \leq X_i$ . Hence,

$$|X_{(n)} - Y_{(n)}| = |X_i - Y_j| \leq \max\{|X_i - Y_i|, |X_j - Y_j|\}.$$

Case 2:  $k = 1$ , suppose that  $X_{(1)} = X_i$  and  $Y_{(1)} = Y_j$ . Similarly

$$|X_{(1)} - Y_{(1)}| = |X_i - Y_j| \leq \max\{|X_i - Y_i|, |X_j - Y_j|\}.$$

Case 3:  $1 < k < n$ , suppose that  $X_{(k)} = X_i$ ,  $Y_{(k)} = Y_j$ , and without loss of generality assume that  $X_i < Y_j$  (if  $X_i = Y_j$ ,  $0 = |X_{(k)} - Y_{(k)}| \leq \max_l |X_l - Y_l|$  holds trivially). We show the conclusion by contradiction.

Assume  $|X_{(k)} - Y_{(k)}| > \max_l |X_l - Y_l|$ . Then one must have  $Y_i < Y_j$  and  $X_j > X_i$  and  $i \neq j$ . Moreover for any  $p < k$  and  $q > k$ , the index of  $X_{(p)}$  cannot be equal to the index of  $Y_{(q)}$ ; otherwise the assumption is violated.

Thus, all  $Y_{(q)}$  for  $q > k$  must share the same index set with  $X_{(p)}$  for  $p > k$ . However,  $X_j$ , which is larger than  $X_i$  (thus if  $X_j = X_{(k')}$ , then  $k' > k$ ), shares the same index with  $Y_j$ , where  $Y_j = Y_{(k)}$ . This yields contradiction.

#### A.3. Proof of Lemma 3

Assume that  $sm$  is an integer. Since there are  $sm$  corrupted samples in total, one can select out at least  $\lceil (\frac{1}{2} - s)m \rceil$  clean samples from the left half of ordered contaminated samples  $\{\theta_{1/m}(\{X_i\}), \theta_{2/m}(\{X_i\}), \dots, \theta_{1/2}(\{X_i\})\}$ . Thus one has the left inequality. Furthermore, one can also select out at least  $\lceil (\frac{1}{2} - s)m \rceil$  clean samples from the right half of ordered contaminated samples  $\{\theta_{1/2}(\{X_i\}), \dots, \theta_1(\{X_i\})\}$ . One has the right inequality.

#### A.4. Proof of Lemma 4

First we introduce some general facts for the distribution of the product of two correlated standard Gaussian random variables (Donahue, 1964). Let  $u \sim \mathcal{N}(0, 1)$ ,  $v \sim \mathcal{N}(0, 1)$ , and their correlation coefficient be  $\rho \in [-1, 1]$ . Then the density of  $uv$  is given by

$$\phi_\rho(x) = \frac{1}{\pi \sqrt{1 - \rho^2}} \exp\left(\frac{\rho x}{1 - \rho^2}\right) K_0\left(\frac{|x|}{1 - \rho^2}\right), \quad x \neq 0,$$

where  $K_0(\cdot)$  is the modified Bessel function of the second kind. Thus the density of  $r = |uv|$  is

$$\psi_\rho(x) = \frac{1}{\pi\sqrt{1-\rho^2}} \left[ \exp\left(\frac{\rho x}{1-\rho^2}\right) + \exp\left(-\frac{\rho x}{1-\rho^2}\right) \right] K_0\left(\frac{|x|}{1-\rho^2}\right), \quad x > 0, \quad (26)$$

for  $|\rho| < 1$ . If  $|\rho| = 1$ ,  $r$  becomes a  $\chi_1^2$  random variable, with the density

$$\psi_{|\rho|=1}(x) = \frac{1}{\sqrt{2\pi}} x^{-1/2} \exp(-x/2), \quad x > 0.$$

It can be seen from (26) that the density of  $r$  only relates to the correlation coefficient  $\rho \in [-1, 1]$ .

Let  $\theta_{1/2}(\psi_\rho)$  be the 1/2 quantile (median) of the distribution  $\psi_\rho(x)$ , and  $\psi_\rho(\theta_{1/2})$  be the value of the function  $\psi_\rho$  at the point  $\theta_{1/2}(\psi_\rho)$ . Although it is difficult to derive the analytical expressions of  $\theta_{1/2}(\psi_\rho)$  and  $\psi_\rho(\theta_{1/2})$  due to the complicated form of  $\psi_\rho$  in (26), due to the continuity of  $\psi_\rho(x)$  and  $\theta_{1/2}(\psi_\rho)$ , we can calculate them numerically, as illustrated in Figure 4. From the numerical calculation, one can see that both  $\psi_\rho(\theta_{1/2})$  and  $\theta_{1/2}(\psi_\rho)$  are bounded from below and above

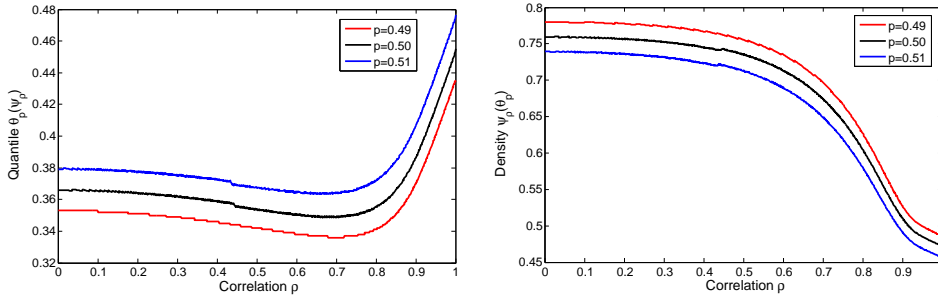

Figure 4. Quantiles and density at quantiles across  $\rho$

for all  $\rho \in [0, 1]$  ( $\psi_\rho(\cdot)$  is symmetric over  $\rho$ , hence it is sufficient to consider  $\rho \in [0, 1]$ ), satisfying

$$0.348 < \theta_{1/2}(\psi_\rho) < 0.455, \quad 0.47 < \psi_\rho(\theta_{1/2}) < 0.76. \quad (27)$$

## B. Robust Initialization with Outliers (Section 5.2)

This section proves that the truncated spectral method provides a good initialization even if  $sm$  measurements are corrupted by arbitrary outliers as long as  $s$  is small.

Consider the model in (1). Lemma 3 yields

$$\theta_{\frac{1}{2}-s}(\{(\mathbf{a}_i^T \mathbf{x})^2\}) < \theta_{1/2}(\{y_i\}) < \theta_{\frac{1}{2}+s}(\{(\mathbf{a}_i^T \mathbf{x})^2\}). \quad (28)$$

Observe that  $\mathbf{a}_i^T \mathbf{x} = \tilde{a}_{i1} \|\mathbf{x}\|$ , where  $\tilde{a}_{i1} = \mathbf{a}_i^T \mathbf{x} / \|\mathbf{x}\|$  is a standard Gaussian random variable. Thus  $|\tilde{a}_{i1}|^2$  is a  $\chi_1^2$  random variable, whose cumulative distribution function is denoted as  $K(x)$ . Moreover by Lemma 1, for a small  $\epsilon$ , one has  $|\theta_{\frac{1}{2}-s}(\{|\tilde{a}_{i1}|^2\}) - \theta_{\frac{1}{2}-s}(K)| < \epsilon$  and  $|\theta_{\frac{1}{2}+s}(\{|\tilde{a}_{i1}|^2\}) - \theta_{\frac{1}{2}+s}(K)| < \epsilon$  with probability  $1 - 2\exp(-cm\epsilon^2)$  and  $c$  is a constant around  $2 \times 0.47^2$  (c.f. Figure 4). We note that  $\theta_{1/2}(K) = 0.455$  and both  $\theta_{\frac{1}{2}-s}(K)$  and  $\theta_{\frac{1}{2}+s}(K)$  can be arbitrarily close to  $\theta_{1/2}(K)$  simultaneously as long as  $s$  is small enough (independent of  $n$ ). Thus one has

$$\left(\theta_{\frac{1}{2}-s}(K) - \epsilon\right) \|\mathbf{x}\|^2 < \theta_{1/2}(\{y_i\}) < \left(\theta_{\frac{1}{2}+s}(K) + \epsilon\right) \|\mathbf{x}\|^2, \quad (29)$$

with probability at least  $1 - \exp(-cm\epsilon^2)$ . For the sake of simplicity, we introduce two new notations  $\zeta_s := \theta_{\frac{1}{2}-s}(K)$  and  $\zeta^s := \theta_{\frac{1}{2}+s}(K)$ . Specifically for the instance of  $s = 0.01$ , one has  $\zeta_s = 0.434$  and  $\zeta^s = 0.477$ . It is easy to see that  $\zeta^s - \zeta_s$  can be arbitrarily small if  $s$  is small enough.

We first consider the case when  $\|\mathbf{x}\| = 1$ . On the event that (29) holds, the truncation function has the following bounds,

$$\begin{aligned} \mathbb{1}_{\{y_i \leq \alpha_y^2 \theta_{1/2}(\{y_i\}) / 0.455\}} &\leq \mathbb{1}_{\{y_i \leq \alpha_y^2 (\zeta^s + \epsilon) / 0.455\}} \\ \mathbb{1}_{\{y_i \leq \alpha_y^2 \theta_{1/2}(\{y_i\}) / 0.455\}} &\geq \mathbb{1}_{\{y_i \leq \alpha_y^2 (\zeta_s - \epsilon) / 0.455\}}. \end{aligned}$$

On the other hand, denote the support of the outliers as  $S$ , we have

$$\mathbf{Y} = \frac{1}{m} \sum_{i \notin S} \mathbf{a}_i \mathbf{a}_i^T (\mathbf{a}_i^T \mathbf{x})^2 \mathbb{1}_{\{(\mathbf{a}_i^T \mathbf{x})^2 \leq \alpha_y^2 \theta_{1/2}(\{y_i\})/0.455\}} + \frac{1}{m} \sum_{i \in S} \mathbf{a}_i \mathbf{a}_i^T y_i \mathbb{1}_{\{y_i \leq \alpha_y^2 \theta_{1/2}(\{y_i\})/0.455\}}.$$

Consequently, one can bound  $\mathbf{Y}$  as

$$\begin{aligned} \mathbf{Y}_1 &:= \frac{1}{m} \sum_{i \notin S} \mathbf{a}_i \mathbf{a}_i^T (\mathbf{a}_i^T \mathbf{x})^2 \mathbb{1}_{\{(\mathbf{a}_i^T \mathbf{x})^2 \leq \alpha_y^2 (\zeta_s - \epsilon)/0.455\}} \prec \mathbf{Y} \\ &\prec \frac{1}{m} \sum_{i \notin S} \mathbf{a}_i \mathbf{a}_i^T (\mathbf{a}_i^T \mathbf{x})^2 \mathbb{1}_{\{(\mathbf{a}_i^T \mathbf{x})^2 \leq \alpha_y^2 (\zeta^s + \epsilon)/0.455\}} + \frac{1}{m} \sum_{i \in S} \mathbf{a}_i \mathbf{a}_i^T \alpha_y^2 (\zeta^s + \epsilon)/0.455 =: \mathbf{Y}_2, \end{aligned}$$

where we have

$$\mathbb{E}[\mathbf{Y}_1] = (1-s)(\beta_1 \mathbf{x} \mathbf{x}^T + \beta_2 \mathbf{I}), \quad \mathbb{E}[\mathbf{Y}_2] = (1-s)(\beta_3 \mathbf{x} \mathbf{x}^T + \beta_4 \mathbf{I}) + s \alpha_y^2 \frac{(\zeta^s + \epsilon)}{0.455} \mathbf{I}, \quad (30)$$

with  $\beta_1 := \mathbb{E}[\xi^4 \mathbb{1}_{\{|\xi| \leq \alpha_y \sqrt{(\zeta_s - \epsilon)/0.455}\}}] - \mathbb{E}[\xi^2 \mathbb{1}_{\{|\xi| \leq \alpha_y \sqrt{(\zeta_s - \epsilon)/0.455}\}}]$ ,  $\beta_2 := \mathbb{E}[\xi^2 \mathbb{1}_{\{|\xi| \leq \alpha_y \sqrt{(\zeta_s - \epsilon)/0.455}\}}]$  and  $\beta_3 := \mathbb{E}[\xi^4 \mathbb{1}_{\{|\xi| \leq \alpha_y \sqrt{(\zeta^s + \epsilon)/0.455}\}}] - \mathbb{E}[\xi^2 \mathbb{1}_{\{|\xi| \leq \alpha_y \sqrt{(\zeta^s + \epsilon)/0.455}\}}]$ ,  $\beta_4 := \mathbb{E}[\xi^2 \mathbb{1}_{\{|\xi| \leq \alpha_y \sqrt{(\zeta^s + \epsilon)/0.455}\}}]$ , assuming  $\xi \sim \mathcal{N}(0, 1)$ .

Applying standard results on random matrices with non-isotropic sub-Gaussian rows (Vershynin, 2012, equation (5.26)) and noticing that  $\mathbf{a}_i \mathbf{a}_i^T (\mathbf{a}_i^T \mathbf{x})^2 \mathbb{1}_{\{|\mathbf{a}_i^T \mathbf{x}| \leq c\}}$  can be rewritten as  $\mathbf{b}_i \mathbf{b}_i^T$  for some sub-Gaussian vector  $\mathbf{b}_i := \mathbf{a}_i (\mathbf{a}_i^T \mathbf{x}) \mathbb{1}_{\{|\mathbf{a}_i^T \mathbf{x}| \leq c\}}$ , one can deduce

$$\|\mathbf{Y}_1 - \mathbb{E}[\mathbf{Y}_1]\| \leq \delta, \quad \|\mathbf{Y}_2 - \mathbb{E}[\mathbf{Y}_2]\| \leq \delta \quad (31)$$

with probability  $1 - \exp(-\Omega(m))$ , provided that  $m/n$  exceeds some large constant. Besides, when  $\epsilon$  and  $s$  are sufficiently small, one further has  $\|\mathbb{E}[\mathbf{Y}_1] - \mathbb{E}[\mathbf{Y}_2]\| \leq \delta$ . Putting these together, one has

$$\|\mathbf{Y} - (1-s)(\beta_1 \mathbf{x} \mathbf{x}^T + \beta_2 \mathbf{I})\| \leq 3\delta. \quad (32)$$

Let  $\tilde{\mathbf{z}}^{(0)}$  be the normalized leading eigenvector of  $\mathbf{Y}$ . Repeating the same argument as in (Candès et al., 2015, Section 7.8) and taking  $\delta, \epsilon$  to be sufficiently small, one has

$$\text{dist}(\tilde{\mathbf{z}}^{(0)}, \mathbf{x}) \leq \tilde{\delta}, \quad (33)$$

for a given  $\tilde{\delta} > 0$ , as long as  $m/n$  exceeds some large constant.

Furthermore let  $\mathbf{z}^{(0)} = \sqrt{\text{med}\{y_i\}/0.455} \tilde{\mathbf{z}}^{(0)}$  to handle cases  $\|\mathbf{x}\| \neq 1$ . By the bound (29), one has

$$\left| \frac{\text{med}\{y_i\}}{0.455} - \|\mathbf{x}\|^2 \right| \leq \max \left\{ \left| \frac{\zeta_s - \epsilon}{0.455} - 1 \right|, \left| \frac{\zeta^s + \epsilon}{0.455} - 1 \right| \right\} \|\mathbf{x}\|^2 \leq \frac{\zeta^s - \zeta_s + \epsilon}{0.455} \|\mathbf{x}\|^2 \quad (34)$$

Thus

$$\text{dist}(\mathbf{z}^{(0)}, \mathbf{x}) \leq \frac{\zeta^s - \zeta_s + \epsilon}{0.455} \|\mathbf{x}\| + \tilde{\delta} \|\mathbf{x}\| \leq \frac{1}{11} \|\mathbf{x}\| \quad (35)$$

as long as  $s$  is a small enough constant.

### C. Geometric Convergence for Noise-free Model (Proof of Corollary 2)

After obtaining a good initialization, the central idea to establish geometric convergence is to show that the truncated gradient  $\nabla \ell_{tr}(\mathbf{z})$  in the neighborhood of the global optima satisfies the *Regularity Condition RC* ( $\mu, \lambda, \epsilon$ ) defined in Definition 2. We show this by two steps. Step 1 establishes a key concentration property for the sample median used in the truncation rule, which is then subsequently exploited to prove RC in Step 2.

### C.1. Proof of Concentration Property for Sample Median

We show that the sample median used in the truncation rule concentrates at the level  $\|\mathbf{z} - \mathbf{x}\| \|\mathbf{z}\|$  as stated in the following proposition. Along the way, we also establish that the sample quantiles around the median are also concentrated at the level  $\|\mathbf{z} - \mathbf{x}\| \|\mathbf{z}\|$ .

**Proposition 2** (Refined version of Proposition 1). *Fix  $\epsilon \in (0, 1)$ . If  $m > c_0(\epsilon^{-2} \log \frac{1}{\epsilon})n \log n$ , then with probability at least  $1 - c_1 \exp(-c_2 m \epsilon^2)$ ,*

$$(0.65 - \epsilon) \|\mathbf{z}\| \|\mathbf{h}\| \leq \text{med}\{ |(\mathbf{a}_i^T \mathbf{x})^2 - (\mathbf{a}_i^T \mathbf{z})^2| \} \leq (0.91 + \epsilon) \|\mathbf{z}\| \|\mathbf{h}\|, \quad (36)$$

$$(0.63 - \epsilon) \|\mathbf{z}\| \|\mathbf{h}\| \leq \theta_{0.49}, \theta_{0.51} \{ |(\mathbf{a}_i^T \mathbf{x})^2 - (\mathbf{a}_i^T \mathbf{z})^2| \} \leq (0.95 + \epsilon) \|\mathbf{z}\| \|\mathbf{h}\|, \quad (37)$$

hold for all  $\mathbf{x}, \mathbf{z}$  with  $\|\mathbf{x} - \mathbf{z}\| < 1/11 \|\mathbf{z}\|$ , where  $\mathbf{h} := \mathbf{z} - \mathbf{x}$ .

*Proof.* We first show for a fixed pair  $\mathbf{z}$  and  $\mathbf{x}$ , (36) and (37) hold with high probability.

Let  $r_i = |(\mathbf{a}_i^T \mathbf{x})^2 - (\mathbf{a}_i^T \mathbf{z})^2|$ . Then  $r_i$ 's are i.i.d. copies of a random variable  $r$ , where  $r = |(\mathbf{a}^T \mathbf{x})^2 - (\mathbf{a}^T \mathbf{z})^2|$  with the entries of  $\mathbf{a}$  composed of i.i.d. standard Gaussian random variables. Note that the distribution of  $r$  is fixed once given  $\mathbf{h}$  and  $\mathbf{z}$ .

Let  $\mathbf{x}(1)$  denote the first element of a generic vector  $\mathbf{x}$ , and  $\mathbf{x}_{-1}$  denote the remaining vector of  $\mathbf{x}$  after eliminating the first element. Let  $\mathbf{U}_h$  be an orthonormal matrix with first row being  $\mathbf{h}^T / \|\mathbf{h}\|$ , and  $\tilde{\mathbf{a}} = \mathbf{U}_h \mathbf{a}$ ,  $\tilde{\mathbf{z}} = \mathbf{U}_h \mathbf{z}$ . Similarly define  $\mathbf{U}_{\tilde{\mathbf{z}}_{-1}}$  and let  $\tilde{\mathbf{b}} = \mathbf{U}_{\tilde{\mathbf{z}}_{-1}} \tilde{\mathbf{a}}_{-1}$ . Then  $\tilde{\mathbf{a}}(1)$  and  $\tilde{\mathbf{b}}(1)$  are independent standard normal random variables. We further express  $r$  as follows.

$$\begin{aligned} r &= |(\mathbf{a}^T \mathbf{z})^2 - (\mathbf{a}^T \mathbf{x})^2| \\ &= |(2\mathbf{a}^T \mathbf{z} - \mathbf{a}^T \mathbf{h})(\mathbf{a}^T \mathbf{h})| \\ &= |(2\tilde{\mathbf{a}}^T \tilde{\mathbf{z}} - \tilde{\mathbf{a}}(1) \|\mathbf{h}\|)(\tilde{\mathbf{a}}(1) \|\mathbf{h}\|)| \\ &= |(2\mathbf{h}^T \mathbf{z} - \|\mathbf{h}\|^2) \tilde{\mathbf{a}}(1)^2 + 2(\tilde{\mathbf{a}}_{-1}^T \tilde{\mathbf{z}}_{-1})(\tilde{\mathbf{a}}(1) \|\mathbf{h}\|)| \\ &= |(2\mathbf{h}^T \mathbf{z} - \|\mathbf{h}\|^2) \tilde{\mathbf{a}}(1)^2 + 2\tilde{\mathbf{b}}(1) \|\tilde{\mathbf{z}}_{-1}\| \tilde{\mathbf{a}}(1) \|\mathbf{h}\|)| \\ &= |(2\mathbf{h}^T \mathbf{z} - \|\mathbf{h}\|^2) \tilde{\mathbf{a}}(1)^2 + 2\sqrt{\|\mathbf{z}\|^2 - \tilde{\mathbf{z}}(1)^2} \tilde{\mathbf{a}}(1) \tilde{\mathbf{b}}(1) \|\mathbf{h}\|)| \\ &= \left| \left( 2 \frac{\mathbf{h}^T \mathbf{z}}{\|\mathbf{h}\| \|\mathbf{z}\|} - \frac{\|\mathbf{h}\|}{\|\mathbf{z}\|} \right) \tilde{\mathbf{a}}(1)^2 + 2 \sqrt{1 - \left( \frac{\mathbf{h}^T \mathbf{z}}{\|\mathbf{h}\| \|\mathbf{z}\|} \right)^2} \tilde{\mathbf{a}}(1) \tilde{\mathbf{b}}(1) \right| \cdot \|\mathbf{h}\| \|\mathbf{z}\| \\ &=: \left| (2 \cos(\omega) - t) \tilde{\mathbf{a}}(1)^2 + 2 \sqrt{1 - \cos^2(\omega)} \tilde{\mathbf{a}}(1) \tilde{\mathbf{b}}(1) \right| \cdot \|\mathbf{h}\| \|\mathbf{z}\| \\ &=: |u\tilde{v}| \cdot \|\mathbf{h}\| \|\mathbf{z}\| \end{aligned}$$

where  $\omega$  is the angle between  $\mathbf{h}$  and  $\mathbf{z}$ , and  $t = \|\mathbf{h}\| / \|\mathbf{z}\| < 1/11$ . Consequently,  $u = \tilde{\mathbf{a}}(1) \sim \mathcal{N}(0, 1)$  and  $\tilde{v} = (2 \cos(\omega) - t) \tilde{\mathbf{a}}(1) + 2 |\sin(\omega)| \tilde{\mathbf{b}}(1)$  is also a Gaussian random variable with variance  $3.6 < \text{Var}(\tilde{v}) < 4$  under the assumption  $t < 1/11$ .

Let  $v = \tilde{v} / \sqrt{\text{Var}(\tilde{v})}$ , then  $v \sim \mathcal{N}(0, 1)$ . Furthermore, let  $r' = |uv|$ . Denote the density function of  $r'$  as  $\psi_\rho(\cdot)$  and the 1/2-quantile point of  $r'$  as  $\theta_{1/2}(\psi_\rho)$ . By Lemma 4, we have

$$0.47 < \psi_\rho(\theta_{1/2}) < 0.76, \quad 0.348 < \theta_{1/2}(\psi_\rho) < 0.455. \quad (38)$$

By Lemma 1, we have with probability at least  $1 - 2 \exp(-cm\epsilon^2)$  (here  $c$  is around  $2 \times 0.47^2$ ),

$$0.348 - \epsilon < \text{med}(\{r'_i\}_{i=1}^m) < 0.455 + \epsilon. \quad (39)$$

The same arguments carry over to other quantiles  $\theta_{0.49}(\{r'_i\})$  and  $\theta_{0.51}(\{r'_i\})$ . From Figure. 4, we observe that for  $\rho \in [0, 1]$

$$0.45 < \psi_\rho(\theta_{0.49}), \psi_\rho(\theta_{0.51}) < 0.78, \quad 0.336 < \theta_{0.49}(\psi_\rho), \theta_{0.51}(\psi_\rho) < 0.477 \quad (40)$$

and then we have with probability at least  $1 - 2 \exp(-cm\epsilon^2)$  (here  $c$  is around  $2 \times 0.45^2$ ),

$$0.336 - \epsilon < \theta_{0.49}(\{r'_m\}), \theta_{0.51}(\{r'_m\}) < 0.477 + \epsilon. \quad (41)$$

Hence, by multiplying back  $\sqrt{\text{Var}(\hat{v})}$ , we have with probability  $1 - 2 \exp(-cm\epsilon^2)$ ,

$$(0.65 - \epsilon)\|\mathbf{z} - \mathbf{x}\|\|\mathbf{z}\| \leq \text{med}(\{ |(\mathbf{a}_i^T \mathbf{z})^2 - (\mathbf{a}_i^T \mathbf{x})^2| \}) \leq (0.91 + \epsilon)\|\mathbf{z} - \mathbf{x}\|\|\mathbf{z}\|, \quad (42)$$

$$(0.63 - \epsilon)\|\mathbf{z} - \mathbf{x}\|\|\mathbf{z}\| \leq \theta_{0.49}, \theta_{0.51}(\{ |(\mathbf{a}_i^T \mathbf{z})^2 - (\mathbf{a}_i^T \mathbf{x})^2| \}) \leq (0.95 + \epsilon)\|\mathbf{z} - \mathbf{x}\|\|\mathbf{z}\|. \quad (43)$$

We note that, to keep notation simple,  $c$  and  $\epsilon$  may vary line by line within constant factors.

Up to now, we proved for any fixed  $\mathbf{z}$  and  $\mathbf{x}$ , the median or neighboring quantiles of  $\{ |(\mathbf{a}_i^T \mathbf{z})^2 - (\mathbf{a}_i^T \mathbf{x})^2| \}$  are upper and lower bounded by  $\|\mathbf{z} - \mathbf{x}\|\|\mathbf{z}\|$  times constant factors. To prove (36) and (37) for all  $\mathbf{z}$  and  $\mathbf{x}$  with  $\|\mathbf{z} - \mathbf{x}\| \leq \frac{1}{11}\|\mathbf{z}\|$ , we use the net covering argument. Still we argue for median first and the same arguments carry over to other quantiles smoothly.

To proceed, we restate (42) as

$$(0.65 - \epsilon) \leq \text{med} \left( \left\{ \left| \left( \frac{2(\mathbf{a}_i^T \mathbf{z})}{\|\mathbf{z}\|} - \frac{\mathbf{a}_i^T \mathbf{h} \|\mathbf{h}\|}{\|\mathbf{h}\| \|\mathbf{z}\|} \right) \frac{\mathbf{a}_i^T \mathbf{h}}{\|\mathbf{h}\|} \right| \right\} \right) \leq (0.91 + \epsilon), \quad (44)$$

holds with probability at least  $1 - 2 \exp(-cm\epsilon^2)$  for a given pair  $\mathbf{h}, \mathbf{z}$  satisfying  $\|\mathbf{h}\|/\|\mathbf{z}\| \leq 1/11$ .

Let  $\tau = \epsilon/(6n + 6m)$ , and let  $\mathcal{S}_\tau$  be a  $\tau$ -net covering the unit sphere,  $\mathcal{L}_\tau$  be a  $\tau$ -net covering a line with length  $1/11$ , and set

$$\mathcal{N}_\tau = \{(\mathbf{z}_0, \mathbf{h}_0, t_0) : (\mathbf{z}_0, \mathbf{h}_0, t_0) \in \mathcal{S}_\tau \times \mathcal{S}_\tau \times \mathcal{L}_\tau\}. \quad (45)$$

One has cardinality bound (i.e., the upper bound on the covering number)  $|\mathcal{N}_\tau| \leq (1 + 2/\tau)^{2n}/(11\tau) < (1 + 2/\tau)^{2n+1}$ . Taking the union bound we have

$$(0.65 - \epsilon) \leq \text{med}(\{ |2(\mathbf{a}_i^T \mathbf{z}_0) - (\mathbf{a}_i^T \mathbf{h}_0)t_0| |\mathbf{a}_i^T \mathbf{h}_0| \}) \leq (0.91 + \epsilon), \quad \forall (\mathbf{z}_0, \mathbf{h}_0, t_0) \in \mathcal{N}_\tau \quad (46)$$

with probability at least  $1 - (1 + 2/\tau)^{2n+1} \exp(-cm\epsilon^2)$ .

We next argue that (46) holds with probability  $1 - c_1 \exp(-c_2 m \epsilon^2)$  for some constants  $c_1, c_2$  as long as  $m \geq c_0(\epsilon^{-2} \log \epsilon^{-1})n \log n$  for sufficient large constant  $c_0$ . To prove this claim, we first observe

$$(1 + 2/\tau)^{2n+1} \asymp \exp(2n(\log(n + m) + \log 12 + \log(1/\epsilon))) \asymp \exp(2n(\log m)).$$

We note that once  $\epsilon$  is chosen, it is fixed in the whole proof and does not scale with  $m$  or  $n$ . For simplicity, assume that  $\epsilon < 1/e$ . Fix some positive constant  $c' < c - c_2$ . It then suffices to show that there exist large constant  $c_0$  such that if  $m \geq c_0(\epsilon^{-2} \log \epsilon^{-1})n \log n$ , then

$$2n \log m < c' m \epsilon^2. \quad (47)$$

For any fixed  $n$ , if (47) holds for some  $m$  and  $m > (2/c')\epsilon^{-2}n$ , then (47) always holds for larger  $m$ , because

$$\begin{aligned} 2n \log(m + 1) &= 2n \log m + 2n(\log(m + 1) - \log m) = 2n \log m + \frac{2n}{m} \log(1 + \frac{1}{m})^m \\ &\leq 2n \log m + \frac{2n}{m} \leq c' m \epsilon^2 + c' \epsilon^2 = c'(m + 1)\epsilon^2. \end{aligned}$$

Next, for any  $n$ , we can always find a  $c_0$  such that (47) holds for  $m = c_0(\epsilon^{-2} \log \epsilon^{-1})n \log n$ . Such  $c_0$  can be easily found for large  $n$ , i.e.,  $c_0 = 4/c'$  is a valid option if

$$(4/c')(\epsilon^{-2} \log \epsilon^{-1})n \log n < n^2. \quad (48)$$

Moreover, since the number of  $n$  that violates (48) is finite, the maximum over all such  $c_0$  serves the purpose.

Next, one needs to bound

$$|\text{med}(\{|2(\mathbf{a}_i^T \mathbf{z}_0) - (\mathbf{a}_i^T \mathbf{h}_0)t_0| |\mathbf{a}_i^T \mathbf{h}_0|\}) - \text{med}(\{|2(\mathbf{a}_i^T \mathbf{z}) - (\mathbf{a}_i^T \mathbf{h})t| |\mathbf{a}_i^T \mathbf{h}|\})|$$

for any  $\|\mathbf{z} - \mathbf{z}_0\| < \tau$ ,  $\|\mathbf{z} - \mathbf{z}_0\| < \tau$  and  $\|t - t_0\| < \tau$ .

By Lemma 2 and the relation  $||x| - |y|| \leq |x - y|$ , we have

$$\begin{aligned} & |\text{med}(\{|2(\mathbf{a}_i^T \mathbf{z}_0) - (\mathbf{a}_i^T \mathbf{h}_0)t_0| |\mathbf{a}_i^T \mathbf{h}_0|\}) - \text{med}(\{|2(\mathbf{a}_i^T \mathbf{z}) - (\mathbf{a}_i^T \mathbf{h})t| |\mathbf{a}_i^T \mathbf{h}|\})| \\ & \leq \max_{i \in [m]} |(2(\mathbf{a}_i^T \mathbf{z}_0) - (\mathbf{a}_i^T \mathbf{h}_0)t_0) (\mathbf{a}_i^T \mathbf{h}_0) - (2(\mathbf{a}_i^T \mathbf{z}) - (\mathbf{a}_i^T \mathbf{h})t) (\mathbf{a}_i^T \mathbf{h})| \\ & \leq \max_{i \in [m]} |(2(\mathbf{a}_i^T \mathbf{z}_0) - (\mathbf{a}_i^T \mathbf{h}_0)t_0) (\mathbf{a}_i^T \mathbf{h}_0) - (2(\mathbf{a}_i^T \mathbf{z}) - (\mathbf{a}_i^T \mathbf{h})t) (\mathbf{a}_i^T \mathbf{h}_0)| \\ & \quad + \max_{i \in [m]} |(2(\mathbf{a}_i^T \mathbf{z}) - (\mathbf{a}_i^T \mathbf{h})t) (\mathbf{a}_i^T \mathbf{h}_0) - (2(\mathbf{a}_i^T \mathbf{z}) - (\mathbf{a}_i^T \mathbf{h})t) (\mathbf{a}_i^T \mathbf{h})| \\ & \leq \max_{i \in [m]} (|2\mathbf{a}_i^T (\mathbf{z}_0 - \mathbf{z})| + |(\mathbf{a}_i^T \mathbf{h}_0)t_0 - (\mathbf{a}_i^T \mathbf{h})t|) |\mathbf{a}_i^T \mathbf{h}_0| + \max_{i \in [m]} |2(\mathbf{a}_i^T \mathbf{z}) - (\mathbf{a}_i^T \mathbf{h})t| |\mathbf{a}_i^T (\mathbf{h}_0 - \mathbf{h})| \\ & \leq \max_{i \in [m]} \|\mathbf{a}_i\|^2 (3 + t)\tau + \max_{i \in [m]} \|\mathbf{a}_i\|^2 (2 + t)\tau \\ & \leq \max_{i \in [m]} \|\mathbf{a}_i\|^2 (5 + 2t)\tau \end{aligned}$$

On the event  $E_1 := \{\max_{i \in [m]} \|\mathbf{a}_i\|^2 \leq m + n\}$ , one can show that

$$|\text{med}(\{|2(\mathbf{a}_i^T \mathbf{z}_0) - (\mathbf{a}_i^T \mathbf{h}_0)t_0| |\mathbf{a}_i^T \mathbf{h}_0|\}) - \text{med}(\{|2(\mathbf{a}_i^T \mathbf{z}) - (\mathbf{a}_i^T \mathbf{h})t| |\mathbf{a}_i^T \mathbf{h}|\})| < 6(m + n)\tau < \epsilon. \quad (49)$$

We claim that  $E_1$  holds with probability at least  $1 - m \exp(-m/8)$  if  $m > n$ . This can be argued as follows. Notice that  $\|\mathbf{a}_i\|^2 = \sum_{j=1}^n \mathbf{a}_i(j)^2$ , where  $\mathbf{a}_i(j)$  is the  $j$ th element of  $\mathbf{a}_i$ . In other words,  $\|\mathbf{a}_i\|^2$  is a sum of  $n$  i.i.d.  $\chi_1^2$  random variables. Applying the Bernstein-type inequality (Corollary 5.17 Vershynin) and observing that the sub-exponential norm of  $\chi_1^2$  is smaller than 2, we have

$$\mathbb{P}\{\|\mathbf{a}_i\|^2 \geq m + n\} \leq \exp(-m/8). \quad (50)$$

Then a union bound concludes the claim.

Note that (46) holds on an event  $E_2$ , which has probability  $1 - c_1 \exp(-c_2 m \epsilon^2)$  as long as  $m \geq c_0 (\epsilon^{-2} \log \frac{1}{\epsilon}) n \log n$ . On the intersection of  $E_1$  and  $E_2$ , (36) holds.

The net covering arguments can also carry over to show that (37) holds for all  $\mathbf{x}$  and  $\mathbf{z}$  obeying  $\|\mathbf{x} - \mathbf{z}\| \leq \frac{1}{11} \|\mathbf{z}\|$ .  $\square$

## C.2. Proof of RC

Following Proposition 2, we choose some small  $\epsilon$  (i.e.  $\epsilon < 0.03$ ), then with probability at least  $1 - \exp(-\Omega(m))$ ,

$$0.6 \|\mathbf{z} - \mathbf{x}\| \|\mathbf{z}\| \leq \text{med}(\{|(\mathbf{a}_i^T \mathbf{x})^2 - (\mathbf{a}_i^T \mathbf{z})^2|\}) \leq 1.0 \|\mathbf{z} - \mathbf{x}\| \|\mathbf{z}\| \quad (51)$$

holds for all  $\mathbf{z}$  and  $\mathbf{x}$  satisfying  $\|\mathbf{h}\| \leq 1/11 \|\mathbf{z}\|$ . For each  $i$ , we introduce two new events

$$\mathcal{E}_3^i := \{|(\mathbf{a}_i^T \mathbf{x})^2 - (\mathbf{a}_i^T \mathbf{z})^2| \leq 0.6 \alpha_h \|\mathbf{h}\| \cdot |\mathbf{a}_i^T \mathbf{z}|\}, \quad (52)$$

$$\mathcal{E}_4^i := \{|(\mathbf{a}_i^T \mathbf{x})^2 - (\mathbf{a}_i^T \mathbf{z})^2| \leq 1.0 \alpha_h \|\mathbf{h}\| \cdot |\mathbf{a}_i^T \mathbf{z}|\}. \quad (53)$$

Conditioned on (51), the following inclusion property

$$\mathcal{E}_3^i \subseteq \mathcal{E}_2^i \subseteq \mathcal{E}_4^i \quad (54)$$

holds for all  $i$ , where  $\mathcal{E}_2^i$  is defined in Algorithm 1. It is easier to work with these new events because  $\mathcal{E}_3^i$ 's (resp.  $\mathcal{E}_4^i$ 's) are statistically independent for any fixed  $\mathbf{x}$  and  $\mathbf{z}$ . To further decouple the quadratic inequalities in  $\mathcal{E}_3^i$  and  $\mathcal{E}_4^i$  into linear inequalities, we introduce two more events and states their properties in the following lemma.

**Lemma 5** (Lemma 3 in (Chen & Candès, 2015)). *For any  $\gamma > 0$ , define*

$$\mathcal{D}_\gamma^i := \{ |(\mathbf{a}_i^* \mathbf{x})^2 - (\mathbf{a}_i^* \mathbf{z})^2| \leq \gamma \|\mathbf{h}\| \|\mathbf{a}_i^* \mathbf{z}\| \}, \quad (55)$$

$$\mathcal{D}_\gamma^{i,1} := \left\{ \frac{|\mathbf{a}_i^* \mathbf{h}|}{\|\mathbf{h}\|} \leq \gamma \right\}, \quad (56)$$

$$\mathcal{D}_\gamma^{i,2} := \left\{ \left| \frac{\mathbf{a}_i^* \mathbf{h}}{\|\mathbf{h}\|} - \frac{2\mathbf{a}_i^* \mathbf{z}}{\|\mathbf{h}\|} \right| \leq \gamma \right\}. \quad (57)$$

*On the event  $\mathcal{E}_1^i$  defined in Algorithm 1, the quadratic inequality specifying  $\mathcal{D}_\gamma^i$  implicates that  $\mathbf{a}_i^T \mathbf{h}$  belongs to two intervals centered around 0 and  $2\mathbf{a}_i^T \mathbf{z}$ , respectively, i.e.  $\mathcal{D}_\gamma^{i,1}$  and  $\mathcal{D}_\gamma^{i,2}$ . The following inclusion property holds*

$$\left( \mathcal{D}_{\frac{\gamma}{1+\sqrt{2}}}^{i,1} \cap \mathcal{E}_1^i \right) \cup \left( \mathcal{D}_{\frac{\gamma}{1+\sqrt{2}}}^{i,2} \cap \mathcal{E}_1^i \right) \subseteq \mathcal{D}_\gamma^i \cap \mathcal{E}_1^i \subseteq (\mathcal{D}_\gamma^{i,1} \cap \mathcal{E}_1^i) \cup (\mathcal{D}_\gamma^{i,2} \cap \mathcal{E}_1^i). \quad (58)$$

Using Lemma 2, we can establish that  $-\langle \frac{1}{m} \nabla \ell_{tr}(\mathbf{z}), \mathbf{h} \rangle$  is lower bounded on the order of  $\|\mathbf{h}\|^2$ , as in Proposition 3, and that  $\|\frac{1}{m} \nabla \ell_{tr}(\mathbf{z})\|$  is upper bounded on the order of  $\|\mathbf{h}\|$ , as in Proposition 4.

**Proposition 3** (Adapted version of Proposition 2 of (Chen & Candès, 2015)). *Consider the noise-free measurements  $y_i = |\mathbf{a}_i^T \mathbf{x}|^2$  and any fixed constant  $\epsilon > 0$ . Under the condition (10), if  $m > c_0 n \log n$ , then with probability at least  $1 - c_1 \exp(-c_2 m)$ ,*

$$-\left\langle \frac{1}{m} \nabla \ell_{tr}(\mathbf{z}), \mathbf{h} \right\rangle \geq 2 \left\{ 1.99 - 2(\zeta_1 + \zeta_2) - \sqrt{8/\pi} \alpha_h^{-1} - \epsilon \right\} \|\mathbf{h}\|^2 \quad (59)$$

*holds uniformly over all  $\mathbf{x}, \mathbf{z} \in \mathbb{R}^n$  satisfying*

$$\frac{\|\mathbf{h}\|}{\|\mathbf{z}\|} \leq \min \left\{ \frac{1}{11}, \frac{\alpha_l}{\alpha_h}, \frac{\alpha_l}{6}, \frac{\sqrt{98/3}(\alpha_l)^2}{2\alpha_u + \alpha_l} \right\}, \quad (60)$$

*where  $c_0, c_1, c_2 > 0$  are some universal constants, and  $\zeta_1, \zeta_2$  are defined in (10).*

The proof of Proposition 3 adapts the proof of Proposition 2 of (Chen & Candès, 2015), by properly setting parameters based on the properties of sample median. For completeness, we include a short outline of the proof in Appendix F.

**Proposition 4** (Lemma 7 of (Chen & Candès, 2015)). *Under the same condition as in Proposition 3, if  $m > c_0 n \log n$ , then there exist some constants,  $c_1, c_2 > 0$  such that with probability at least  $1 - c_1 \exp(-c_2 m)$ ,*

$$\left\| \frac{1}{m} \nabla \ell_{tr}(\mathbf{z}) \right\| \leq (1 + \delta) \cdot 4\sqrt{1.02 + 2/\alpha_h} \|\mathbf{h}\| \quad (61)$$

*holds uniformly over all  $\mathbf{x}, \mathbf{z} \in \mathbb{R}^n$  satisfying*

$$\frac{\|\mathbf{h}\|}{\|\mathbf{z}\|} \leq \min \left\{ \frac{1}{11}, \frac{\alpha_l}{\alpha_h}, \frac{\alpha_l}{6}, \frac{\sqrt{98/3}(\alpha_l)^2}{2\alpha_u + \alpha_l} \right\}, \quad (62)$$

*where  $\delta$  can be arbitrarily small as long as  $m/n$  sufficiently large.*

With these two propositions, RC is guaranteed by setting  $\mu < \mu_0 := \frac{1.99 - 2(\zeta_1 + \zeta_2) - \sqrt{8/\pi} \alpha_h^{-1}}{4(1+\delta)^2 \cdot (1.02 + 2/\alpha_h)}$  and  $\lambda + \mu \cdot 16(1 + \delta)^2 \cdot (1.02 + 2/\alpha_h) < 4 \left\{ 1.99 - 2(\zeta_1 + \zeta_2) - \sqrt{8/\pi} \alpha_h^{-1} - \epsilon \right\}$ .

## D. Geometric Convergence with Outliers (Proof of Theorem 1)

We consider the model (1) with outliers, i.e.,  $y_i = |\langle \mathbf{a}_i, \mathbf{x} \rangle|^2 + \eta_i$  for  $i = 1, \dots, m$ . It suffices to show that  $\nabla \ell_{tr}(\mathbf{z})$  satisfies the RC. The critical step is to lower and upper bound the sample median of the corrupted measurements. Lemma 3 yields

$$\theta_{\frac{1}{2}-s}(\{ |(\mathbf{a}_i^T \mathbf{x})^2 - (\mathbf{a}_i^T \mathbf{z})^2| \}) \leq \theta_{\frac{1}{2}}(\{ |y_i - (\mathbf{a}_i^T \mathbf{z})^2| \}) \leq \theta_{\frac{1}{2}+s}(\{ |(\mathbf{a}_i^T \mathbf{x})^2 - (\mathbf{a}_i^T \mathbf{z})^2| \}). \quad (63)$$

For the instance of  $s = 0.01$ , by (37) in Proposition 2, we have with probability at least  $1 - 2 \exp(-\Omega(m)\epsilon^2)$ ,

$$(0.63 - \epsilon)\|\mathbf{z}\|\|\mathbf{h}\| \leq \theta_{\frac{1}{2}}(\{|y_i - (\mathbf{a}_i^T \mathbf{z})^2|\}) \leq (0.95 + \epsilon)\|\mathbf{z}\|\|\mathbf{h}\|. \quad (64)$$

To differentiate from  $\mathcal{E}_2^i$ , we define  $\tilde{\mathcal{E}}_2^i := \left\{ |(\mathbf{a}_i^T \mathbf{x})^2 - (\mathbf{a}_i^T \mathbf{z})^2| \leq \alpha_h \text{med} \{|y_i - (\mathbf{a}_i^T \mathbf{z})^2|\} \frac{\|\mathbf{a}_i^T \mathbf{z}\|}{\|\mathbf{z}\|} \right\}$ . We then have

$$\begin{aligned} -\nabla \ell_{tr}(\mathbf{z}) &= 2 \sum_{i=1}^m \frac{(\mathbf{a}_i^T \mathbf{z})^2 - y_i}{\mathbf{a}_i^T \mathbf{z}} \mathbf{a}_i \mathbb{1}_{\mathcal{E}_1^i \cap \mathcal{E}_2^i} \\ &= 2 \underbrace{\sum_{i=1}^m \frac{(\mathbf{a}_i^T \mathbf{z})^2 - (\mathbf{a}_i^T \mathbf{x})^2}{\mathbf{a}_i^T \mathbf{z}} \mathbf{a}_i \mathbb{1}_{\mathcal{E}_1^i \cap \tilde{\mathcal{E}}_2^i}}_{\nabla^{clean} \ell_{tr}(\mathbf{z})} + 2 \underbrace{\sum_{i \in S} \left( \frac{(\mathbf{a}_i^T \mathbf{z})^2 - y_i}{\mathbf{a}_i^T \mathbf{z}} \mathbb{1}_{\mathcal{E}_1^i \cap \mathcal{E}_2^i} - \frac{(\mathbf{a}_i^T \mathbf{z})^2 - (\mathbf{a}_i^T \mathbf{x})^2}{\mathbf{a}_i^T \mathbf{z}} \mathbb{1}_{\mathcal{E}_1^i \cap \tilde{\mathcal{E}}_2^i} \right) \mathbf{a}_i}_{\nabla^{extra} \ell_{tr}(\mathbf{z})}. \end{aligned}$$

Choosing  $\epsilon$  small enough, the inclusion property (i.e.  $\mathcal{E}_3^i \subseteq \tilde{\mathcal{E}}_2^i \subseteq \mathcal{E}_4^i$ ) holds, and all the proof arguments for Proposition 3 and 4 are also valid to  $\nabla^{clean} \ell_{tr}(\mathbf{z})$ . Thus, one has

$$\frac{1}{m} \langle \nabla^{clean} \ell_{tr}(\mathbf{z}), \mathbf{h} \rangle \geq 2 \left\{ 1.99 - 2(\zeta_1 + \zeta_2) - \sqrt{8/\pi} \alpha_h^{-1} - \epsilon \right\} \|\mathbf{h}\|^2, \quad (65)$$

$$\frac{1}{m} \|\nabla^{clean} \ell_{tr}(\mathbf{z})\| \leq (1 + \delta) \cdot 4\sqrt{1.02 + 2/\alpha_h} \|\mathbf{h}\|. \quad (66)$$

We next bound the contribution of  $\nabla^{extra} \ell_{tr}(\mathbf{z})$ . Introduce  $\mathbf{q} = [q_1, \dots, q_m]^T$ , where

$$q_i := \left( \frac{(\mathbf{a}_i^T \mathbf{z})^2 - y_i}{\mathbf{a}_i^T \mathbf{z}} \mathbb{1}_{\mathcal{E}_1^i \cap \mathcal{E}_2^i} - \frac{(\mathbf{a}_i^T \mathbf{z})^2 - (\mathbf{a}_i^T \mathbf{x})^2}{\mathbf{a}_i^T \mathbf{z}} \mathbb{1}_{\mathcal{E}_1^i \cap \tilde{\mathcal{E}}_2^i} \right) \mathbb{1}_{\{i \in S\}}, \quad (67)$$

and then  $|q_i| \leq 2\alpha_h \|\mathbf{h}\|$ . Thus  $\|\mathbf{q}\| \leq \sqrt{sm} \cdot 2\alpha_h \|\mathbf{h}\|$ , and

$$\left\| \frac{1}{m} \nabla^{extra} \ell_{tr}(\mathbf{z}) \right\| = \frac{1}{m} \|\mathbf{A}^T \mathbf{q}\| \leq 2(1 + \delta) \sqrt{s} \alpha_h \|\mathbf{h}\|, \quad (68)$$

$$\left| \left\langle \frac{1}{m} \nabla^{extra} \ell_{tr}(\mathbf{z}), \mathbf{h} \right\rangle \right| \leq \|\mathbf{h}\| \cdot \left\| \frac{1}{m} \nabla^{extra} \ell_{tr}(\mathbf{z}) \right\| \leq 2(1 + \delta) \sqrt{s} \alpha_h \|\mathbf{h}\|^2, \quad (69)$$

where  $\mathbf{A} = [\mathbf{a}_1, \dots, \mathbf{a}_m]^T$ . Then, we have

$$-\left\langle \frac{1}{m} \nabla \ell_{tr}(\mathbf{z}), \mathbf{h} \right\rangle \geq \left\langle \frac{1}{m} \nabla^{clean} \ell_{tr}(\mathbf{z}), \mathbf{h} \right\rangle - \left| \left\langle \frac{1}{m} \nabla^{extra} \ell_{tr}(\mathbf{z}), \mathbf{h} \right\rangle \right| \quad (70)$$

$$\geq 2 \left( 1.99 - 2(\zeta_1 + \zeta_2) - \sqrt{8/\pi} \alpha_h^{-1} - \epsilon - (1 + \delta) \sqrt{s} \alpha_h \right) \|\mathbf{h}\|^2, \quad (71)$$

and

$$\left\| \frac{1}{m} \nabla \ell_{tr}(\mathbf{z}) \right\| \leq \left\| \frac{1}{m} \nabla^{clean} \ell_{tr}(\mathbf{z}) \right\| + \left\| \frac{1}{m} \nabla^{extra} \ell_{tr}(\mathbf{z}) \right\| \quad (72)$$

$$\leq (1 + \delta) \left( 4\sqrt{1.02 + 2/\alpha_h} + 2\sqrt{s} \alpha_h \right) \|\mathbf{h}\|. \quad (73)$$

The RC is guaranteed if  $\mu, \lambda, \epsilon$  are chosen properly and  $s$  is sufficiently small.

## E. Geometric Convergence with Outliers and Bounded Noise (Proof of Theorem 2)

We consider the model (2) with outliers and bounded noise, i.e.,  $y_i = |\langle \mathbf{a}_i, \mathbf{x} \rangle|^2 + w_i + \eta_i$  for  $i = 1, \dots, m$ . We omit the initialization analysis as it is similar to Appendix B. We split our analysis of the gradient loop into two regimes.



• **Regime 1:**  $c_4 \|z\| \geq \|h\| \geq c_3 \frac{\|w\|_\infty}{\|z\|}$ . In this regime, error contraction by each gradient step is given by

$$\text{dist}\left(z + \frac{\mu}{m} \nabla \ell_{tr}(z), x\right) \leq (1 - \rho) \text{dist}(z, x). \quad (74)$$

It suffices to justify that  $\nabla \ell_{tr}(z)$  satisfies the RC. Denote  $\tilde{y}_i := (\mathbf{a}_i^T x)^2 + w_i$ . Then by Lemma 3, we have

$$\theta_{\frac{1}{2}-s} \{|\tilde{y}_i - (\mathbf{a}_i^T z)^2|\} \leq \text{med} \{|y_i - (\mathbf{a}_i^T z)^2|\} \leq \theta_{\frac{1}{2}+s} \{|\tilde{y}_i - (\mathbf{a}_i^T z)^2|\}. \quad (75)$$

Moreover, by Lemma 2 we have

$$\left| \theta_{\frac{1}{2}+s} \{|\tilde{y}_i - (\mathbf{a}_i^T z)^2|\} - \theta_{\frac{1}{2}+s} \{ |(\mathbf{a}_i^T x)^2 - (\mathbf{a}_i^T z)^2| \} \right| \leq \|w\|_\infty, \quad (76)$$

$$\left| \theta_{\frac{1}{2}-s} \{|\tilde{y}_i - (\mathbf{a}_i^T z)^2|\} - \theta_{\frac{1}{2}-s} \{ |(\mathbf{a}_i^T x)^2 - (\mathbf{a}_i^T z)^2| \} \right| \leq \|w\|_\infty. \quad (77)$$

Assume that  $s = 0.01$  and apply Proposition 2. Moreover, if  $c_3$  is sufficiently large (i.e.,  $c_3 > 100$ ) and  $\epsilon$  is small enough (i.e.,  $\epsilon < 0.02$ ), then we have

$$0.6 \|x - z\| \|z\| \leq \text{med} \{|y_i - (\mathbf{a}_i^T z)^2|\} \leq \|x - z\| \|z\|. \quad (78)$$

Furthermore, recall  $\tilde{\mathcal{E}}_2^i := \left\{ |(\mathbf{a}_i^T x)^2 - (\mathbf{a}_i^T z)^2| \leq \alpha_h \text{med} \{ |(\mathbf{a}_i^T z)^2 - y_i| \} \frac{|\mathbf{a}_i^T z|}{\|z\|} \right\}$ , then

$$\begin{aligned} -\nabla \ell_{tr}(z) &= 2 \sum_{i=1}^m \frac{(\mathbf{a}_i^T z)^2 - y_i}{\mathbf{a}_i^T z} \mathbf{a}_i \mathbb{1}_{\mathcal{E}_1^i \cap \mathcal{E}_2^i} \\ &= 2 \underbrace{\left( \sum_{i \notin S} \frac{(\mathbf{a}_i^T z)^2 - (\mathbf{a}_i^T x)^2}{\mathbf{a}_i^T z} \mathbf{a}_i \mathbb{1}_{\mathcal{E}_1^i \cap \mathcal{E}_2^i} + \sum_{i \in S} \frac{(\mathbf{a}_i^T z)^2 - (\mathbf{a}_i^T x)^2}{\mathbf{a}_i^T z} \mathbf{a}_i \mathbb{1}_{\mathcal{E}_1^i \cap \tilde{\mathcal{E}}_2^i} \right)}_{\nabla^{clean} \ell_{tr}(z)} \\ &\quad - 2 \underbrace{\sum_{i \notin S} \frac{w_i}{\mathbf{a}_i^T z} \mathbf{a}_i \mathbb{1}_{\mathcal{E}_1^i \cap \mathcal{E}_2^i}}_{\nabla^{noise} \ell_{tr}(z)} + 2 \underbrace{\sum_{i \in S} \left( \frac{(\mathbf{a}_i^T z)^2 - y_i}{\mathbf{a}_i^T z} \mathbb{1}_{\mathcal{E}_1^i \cap \mathcal{E}_2^i} - \frac{(\mathbf{a}_i^T z)^2 - (\mathbf{a}_i^T x)^2}{\mathbf{a}_i^T z} \mathbb{1}_{\mathcal{E}_1^i \cap \tilde{\mathcal{E}}_2^i} \right) \mathbf{a}_i}_{\nabla^{extra} \ell_{tr}(z)}. \end{aligned}$$

For  $i \notin S$ , the inclusion property (i.e.  $\mathcal{E}_3^i \subseteq \mathcal{E}_2^i \subseteq \mathcal{E}_4^i$ ) holds because

$$|y_i - (\mathbf{a}_i^T z)^2| \in |(\mathbf{a}_i^T x)^2 - (\mathbf{a}_i^T z)^2| \pm |w_i|$$

and  $|w_i| \leq \frac{1}{c_3} \|h\| \|z\|$  for some sufficient large  $c_3$ . For  $i \in S$ , the inclusion  $\mathcal{E}_3^i \subseteq \tilde{\mathcal{E}}_2^i \subseteq \mathcal{E}_4^i$  holds because of (78). All the proof arguments for Proposition 3 and 4 are also valid for  $\nabla^{clean} \ell_{tr}(z)$ , and thus we have

$$\frac{1}{m} \langle \nabla^{clean} \ell_{tr}(z), h \rangle \geq 2 \left\{ 1.99 - 2(\zeta_1 + \zeta_2) - \sqrt{8/\pi} \alpha_h^{-1} - \epsilon \right\} \|h\|^2, \quad (79)$$

$$\frac{1}{m} \|\nabla^{clean} \ell_{tr}(z)\| \leq (1 + \delta) \cdot 4\sqrt{1.02 + 2/\alpha_h} \|h\|. \quad (80)$$

Next, we turn to control the contribution of the noise. Let  $\tilde{w}_i = \frac{2w_i}{\mathbf{a}_i^T z} \mathbb{1}_{\mathcal{E}_1^i \cap \mathcal{E}_2^i}$ , then we have

$$\frac{1}{m} \|\nabla^{noise} \ell_{tr}(z)\| = \left\| \frac{1}{m} \mathbf{A}^T \tilde{w} \right\| \leq \left\| \frac{1}{\sqrt{m}} \mathbf{A}^T \right\| \left\| \frac{\tilde{w}}{\sqrt{m}} \right\| \leq (1 + \delta) \|\tilde{w}\|_\infty \leq (1 + \delta) \frac{2\|w\|_\infty}{\alpha_l \|z\|}, \quad (81)$$

when  $m/n$  is sufficiently large. Given the regime condition  $\|h\| \geq c_3 \frac{\|w\|_\infty}{\|z\|}$ , we further have

$$\frac{1}{m} \|\nabla^{noise} \ell_{tr}(z)\| \leq \frac{2(1 + \delta)}{c_3 \alpha_l} \|h\|, \quad (82)$$

$$\frac{1}{m} |\langle \nabla^{noise} \ell_{tr}(z), h \rangle| \leq \frac{1}{m} \|\nabla^{noise} \ell_{tr}(z)\| \cdot \|h\| \leq \frac{2(1 + \delta)}{c_3 \alpha_l} \|h\|^2. \quad (83)$$

We next bound the contribution of  $\nabla^{extra} \ell_{tr}(\mathbf{z})$ . Introduce  $\mathbf{q} = [q_1, \dots, q_m]^T$ , where

$$q_i := 2 \left( \frac{(\mathbf{a}_i^T \mathbf{z})^2 - y_i}{\mathbf{a}_i^T \mathbf{z}} \mathbb{1}_{\mathcal{E}_1^i \cap \mathcal{E}_2^i} - \frac{(\mathbf{a}_i^T \mathbf{z})^2 - (\mathbf{a}_i^T \mathbf{x})^2}{\mathbf{a}_i^T \mathbf{z}} \mathbb{1}_{\mathcal{E}_1^i \cap \bar{\mathcal{E}}_2^i} \right) \mathbb{1}_{\{i \in S\}}. \quad (84)$$

Then  $|q_i| \leq 2\alpha_h \|\mathbf{h}\|$ , and  $\|\mathbf{q}\| \leq \sqrt{sm} \cdot 2\alpha_h \|\mathbf{h}\|$ . We thus have

$$\left\| \frac{1}{m} \nabla^{extra} \ell_{tr}(\mathbf{z}) \right\| = \frac{1}{m} \|\mathbf{A}^T \mathbf{q}\| \leq 2(1 + \delta) \sqrt{s} \alpha_h \|\mathbf{h}\|, \quad (85)$$

$$\left| \left\langle \frac{1}{m} \nabla^{extra} \ell_{tr}(\mathbf{z}), \mathbf{h} \right\rangle \right| \leq \|\mathbf{h}\| \cdot \left\| \frac{1}{m} \nabla^{extra} \ell_{tr}(\mathbf{z}) \right\| \leq 2(1 + \delta) \sqrt{s} \alpha_h \|\mathbf{h}\|^2. \quad (86)$$

Putting these together, one has

$$\begin{aligned} -\frac{1}{m} \langle \nabla \ell_{tr}(\mathbf{z}), \mathbf{h} \rangle &\geq \frac{1}{m} \langle \nabla^{clean} \ell_{tr}(\mathbf{z}), \mathbf{h} \rangle - \frac{1}{m} |\langle \nabla^{noise} \ell_{tr}(\mathbf{z}), \mathbf{h} \rangle| - \frac{1}{m} |\langle \nabla^{extra} \ell_{tr}(\mathbf{z}), \mathbf{h} \rangle| \\ &\geq 2 \left( 1.99 - 2(\zeta_1 + \zeta_2) - \sqrt{8/\pi} \alpha_h^{-1} - \epsilon - (1 + \delta)(1/(c_3 \alpha_z^l) + \sqrt{s} \alpha_h) \right) \|\mathbf{h}\|^2, \end{aligned} \quad (87)$$

and

$$\begin{aligned} \frac{1}{m} \|\nabla \ell_{tr}(\mathbf{z})\| &\leq \frac{1}{m} \|\nabla^{clean} \ell_{tr}(\mathbf{z})\| + \frac{1}{m} \|\nabla^{noise} \ell_{tr}(\mathbf{z})\| + \frac{1}{m} \|\nabla^{extra} \ell_{tr}(\mathbf{z})\| \\ &\leq 2(1 + \delta) \left( 2\sqrt{1.02 + 2/\alpha_h} + 1/(c_3 \alpha_z^l) + \sqrt{s} \alpha_h \right) \|\mathbf{h}\|. \end{aligned} \quad (88)$$

The RC is guaranteed if  $\mu, \lambda, \epsilon$  are chosen properly,  $c_3$  is sufficiently large and  $s$  is sufficiently small.

• **Regime 2:** Once the iterate enters this regime with  $\|\mathbf{h}\| \leq \frac{c_3 \|\mathbf{w}\|_\infty}{\|\mathbf{z}\|}$ , each gradient iterate may not reduce the estimation error. However, in this regime each move size  $\frac{\mu}{m} \nabla \ell_{tr}(\mathbf{z})$  is at most  $\mathcal{O}(\|\mathbf{w}\|_\infty / \|\mathbf{z}\|)$ . Then the estimation error cannot increase by more than  $\frac{\|\mathbf{w}\|_\infty}{\|\mathbf{z}\|}$  with a constant factor. Thus one has

$$\text{dist} \left( \mathbf{z} + \frac{\mu}{m} \nabla \ell_{tr}(\mathbf{z}), \mathbf{x} \right) \leq c_5 \frac{\|\mathbf{w}\|_\infty}{\|\mathbf{x}\|} \quad (89)$$

for some constant  $c_5$ . As long as  $\|\mathbf{w}\|_\infty / \|\mathbf{x}\|^2$  is sufficiently small, it is guaranteed that  $c_5 \frac{\|\mathbf{w}\|_\infty}{\|\mathbf{x}\|} \leq c_4 \|\mathbf{x}\|$ . If the iterate jumps out of *Regime 2*, it falls into *Regime 1*.

## F. Proof of Proposition 3

The proof adapts the proof of Proposition 2 in (Chen & Candès, 2015). We outline the main steps for completeness. Observe that for the noise-free case,  $y_i = (\mathbf{a}_i^T \mathbf{x})^2$ . We obtain

$$\begin{aligned} -\frac{1}{2m} \nabla \ell_{tr}(\mathbf{z}) &= \frac{1}{m} \sum_{i=1}^m \frac{(\mathbf{a}_i^T \mathbf{z})^2 - (\mathbf{a}_i^T \mathbf{x})^2}{\mathbf{a}_i^T \mathbf{z}} \mathbf{a}_i \mathbb{1}_{\mathcal{E}_1^i \cap \mathcal{E}_2^i} \\ &= \frac{1}{m} \sum_{i=1}^m 2(\mathbf{a}_i^T \mathbf{h}) \mathbf{a}_i \mathbb{1}_{\mathcal{E}_1^i \cap \mathcal{E}_2^i} - \frac{1}{m} \sum_{i=1}^m \frac{(\mathbf{a}_i^T \mathbf{h})^2}{\mathbf{a}_i^T \mathbf{z}} \mathbf{a}_i \mathbb{1}_{\mathcal{E}_1^i \cap \bar{\mathcal{E}}_2^i}. \end{aligned} \quad (90)$$

One expects the contribution of the second term in (90) to be small as  $\|\mathbf{h}\| / \|\mathbf{z}\|$  decreases.

Specifically, following the two inclusion properties (54) and (58), we have

$$\mathcal{D}_{\gamma_3}^{i,1} \cap \mathcal{E}_{1,\gamma_3}^i \subseteq \mathcal{E}_3^i \cap \mathcal{E}_1^i \subseteq \mathcal{E}_2^i \cap \mathcal{E}_1^i \subseteq \mathcal{E}_4^i \cap \mathcal{E}_1^i \subseteq (\mathcal{D}_{\gamma_4}^{i,1} \cup \mathcal{D}_{\gamma_4}^{i,2}) \cap \mathcal{E}_1^i \quad (91)$$

where the parameters  $\gamma_3, \gamma_4$  are given by

$$\gamma_3 := 0.248\alpha_h, \quad \text{and} \quad \gamma_4 := \alpha_h. \quad (92)$$

Continuing with the identity (90), we have a lower bound

$$-\left\langle \frac{1}{2m} \nabla \ell_{tr}(\mathbf{z}), \mathbf{h} \right\rangle \geq \frac{2}{m} \sum_{i=1}^m (\mathbf{a}_i^T \mathbf{h})^2 \mathbb{1}_{\mathcal{E}_1^i \cap \mathcal{D}_{\gamma_3}^{i,1}} - \frac{1}{m} \sum_{i=1}^m \frac{|\mathbf{a}_i^T \mathbf{h}|^3}{|\mathbf{a}_i^T \mathbf{z}|} \mathbb{1}_{\mathcal{D}_{\gamma_4}^{i,1} \cap \mathcal{E}_1^i} - \frac{1}{m} \sum_{i=1}^m \frac{|\mathbf{a}_i^T \mathbf{h}|^3}{|\mathbf{a}_i^T \mathbf{z}|} \mathbb{1}_{\mathcal{D}_{\gamma_4}^{i,2} \cap \mathcal{E}_1^i}. \quad (93)$$

The three terms in (93) can be bounded following Lemmas 4, 5, and 6 in (Chen & Candès, 2015), which concludes the proof.
